# Supplementary material for: Community Perceptions of the “Health Equity Navigators” Program: A Cross-Sectional Study in Rural and Underserved US Populations
Source: Research Square preprint supplement (doi:10.21203/rs.3.rs-6865483/v1), 2025-07-01
Supplement: Supplementary file 1 [file f0f709c9334f8053cf5a088d.docx]

**HENS (Health Equity Navigator Survey)**

1. What is your gender/sex?
   - Female
   - Male
   - Other: ___________
2. What is your age?
   - 0 -18 years
   - 19 – 24 years
   - 25 – 30 years
   - 31 – 36 years
   - 37 – 42 years
   - 43 – 48 years
   - 49 – 54 years
   - 55 – 60 years
   - 61 – 64 years
   - 65+ years
3. What is your race?

- American Indian or Alaska Native
- Asian
- Black or African American
- Native Hawaiian or Pacific Islander
- White
- Other: (please specify) ______________

1. What is your highest level of education?

- No formal schooling
- Primary school
- Secondary school/High school
- University
- Some College/Technical College
- Prefer not to say

1. What is your county of residence?

- Troup
- Heard
- Carroll
- Meriwether
- Coweta
- Fayette
- Henry
- Spalding
- Pike
- Butts
- Upson
- Lamar

1. What is your place of residence?

- Urban (Large Town: 50,000 people or more)
- Rural (Small Town)

1. What is your employment status?

- Working
- Not working
- Furloughed/Temporary Leave
- Disabled
- Student

**About COVID-19**

1. I consider my household to be high risk for contracting COVID-19.

- Strongly Agree
- Agree
- Neutral
- Disagree
- Strongly Disagree

1. My household has access to get masks whenever we need them.

- Strongly Agree
- Agree
- Neutral
- Disagree
- Strongly Disagree

1. My household wears masks as a measure to protect against COVID-19 infection.

- Strongly Agree
- Agree
- Neutral
- Disagree
- Strongly Disagree

1. I feel that being vaccinated against COVID-19 is effective to my life.

- Strongly Agree
- Agree
- Neutral
- Disagree
- Strongly Disagree

**About health information source**

1. Me and my household normally get our health information from news outlets.

- Strongly Agree
- Agree
- Neutral
- Disagree
- Strongly Disagree

1. Me and my household normally get our health information from health navigators or care managers.

- Strongly Agree
- Agree
- Neutral
- Disagree
- Strongly Disagree

**About healthcare accessibility and wellness**

1. My community has a public transportation system in place.

- Strongly Agree
- Agree
- Neutral
- Disagree
- Strongly Disagree

1. My community has a public park.

- Strongly Agree
- Agree
- Neutral
- Disagree
- Strongly Disagree

1. My community has a walking trail.

- Strongly Agree
- Agree
- Neutral
- Disagree
- Strongly Disagree

1. I know where my community’s Department of Community Health (DPH) Center is located.

- Strongly Agree
- Agree
- Neutral
- Disagree
- Strongly Disagree

1. I know what health related services my local DPH provides.

- Strongly Agree
- Agree
- Neutral
- Disagree

1. My community has a hospital system in place where I can receive emergency care.

- Strongly Agree
- Agree
- Neutral
- Disagree
- Strongly Disagree

1. My community has a family care provider where I can receive healthcare services.

- Strongly Agree
- Agree
- Neutral
- Disagree
- Strongly Disagree

**About Health Equity Navigators**

Health Equity Navigator: Also known as a patient navigator or resource navigator, Health Equity Navigators are defined as members of a multidisciplinary healthcare team who support individuals by connecting them to resources to overcome challenges of obtaining quality care. Health Equity Navigators address social determinants of health that include: health care access, insurance enrollment and lack of insurance services, limited health literacy, lack of transportation, child care, and more.

Source: <https://cdphe.colorado.gov/chronic-disease-prevention/health-navigator-workforce-development/who-is-a-health-navigator#:~:text=A%20health%20navigator%20%28also%20known%20as%20a%20patient,poor%20health%20literacy%2C%20transportation%2C%20child%20care%20and%20more>

1. I have heard about Health Equity Navigators.

- Strongly Agree
- Agree
- Neutral
- Disagree
- Strongly Disagree

1. I have heard of the Health Equity Navigator Program (HENP).

- Strongly Agree
- Agree
- Neutral
- Disagree
- Strongly Disagree

1. I feel HENP services will help improve my knowledge of resources in my community.

- Strongly Agree
- Agree
- Neutral
- Disagree
- Strongly Disagree

1. I feel HENP services will help improve my awareness of health resources in my community.

- Strongly Agree
- Agree
- Neutral
- Disagree
- Strongly Disagree

1. I feel HENP services will improve my attitude about healthcare service access.

- Strongly Agree
- Agree
- Neutral
- Disagree
- Strongly Disagree

1. I feel HENP services will increase my ability to seek healthcare services more efficiently.

- Strongly Agree
- Agree
- Neutral
- Disagree
- Strongly Disagree
